# Supplementary material
Source: MDPI journal article supplement (https://www.mdpi.com/2076-3417/11/10/4337)
Supplement: s1 [file s1]

## Supplementary Material

# Biocrude from *Nannochloropsis gaditana* by hydrothermal liquefaction: An experimental design approach

Alejandra Sánchez-Bayo<sup>1</sup>, Irene Megía Hervás<sup>1,2</sup>, Rosalía Rodríguez<sup>1</sup>, Victoria Morales<sup>3</sup>, Luis Fernando Bautista<sup>2,\*</sup>, Gemma Vicente<sup>1</sup>

<sup>1</sup> Department of Chemical, Energy and Mechanical Technology. ESCET, Universidad Rey Juan Carlos, Móstoles, 28933 Madrid, Spain; alejandra.sanchezbayo@urjc.es (A.S.-B.), irene.megia@urjc.es (I.M.-H.), rosalia.rodiguez@urjc.es (R.R.); gemma.vicente@urjc.es (G.V.)

<sup>2</sup> AlgaEnergy S.A. Parque Empresarial La Moraleja, Avda. Europa, 19. Alcobendas, 28108 Madrid, Spain

<sup>3</sup> Department of Chemical and Environmental Technology. ESCET, Universidad Rey Juan Carlos, Móstoles, 28933 Madrid, Spain; fernando.bautista@urjc.es (L.F.B.); victoria.morales@urjc.es (V.M.)

\* Correspondence: e-mail@e-mail.com; Tel.: (optional; include country code; if there are multiple corresponding authors, add author initials)

**Table S1.** ANOVA for biocrude response.

| Source                          | Sum of squares | Gl | Middle Square | Ratio-F | <i>p-value</i> |
|---------------------------------|----------------|----|---------------|---------|----------------|
| X <sub>T</sub>                  | 1404.22        | 1  | 1404.22       | 1387.06 | 0.0000         |
| X <sub>t</sub>                  | 27.06          | 1  | 27.06         | 26.73   | 0.0013         |
| X <sub>CS</sub>                 | 0.28           | 1  | 0.28          | 0.28    | 0.6117         |
| X <sub>T</sub> X <sub>T</sub>   | 22.14          | 1  | 22.14         | 21.87   | 0.0023         |
| X <sub>T</sub> X <sub>t</sub>   | 15.18          | 1  | 15.18         | 14.99   | 0.0061         |
| X <sub>T</sub> X <sub>CS</sub>  | 5.746          | 1  | 5.74          | 5.68    | 0.0487         |
| X <sub>t</sub> X <sub>t</sub>   | 0.10           | 1  | 0.10          | 0.11    | 0.7548         |
| X <sub>t</sub> X <sub>CS</sub>  | 17.52          | 1  | 17.52         | 17.31   | 0.0042         |
| X <sub>CS</sub> X <sub>CS</sub> | 4.46           | 1  | 4.46          | 4.41    | 0.0740         |
| Total error                     | 7.08           | 7  | 1.01          |         |                |
| Error                           | 1503.78        | 16 |               |         |                |

**Table S2.** ANOVA for N content response.

| Source                          | Sum of squares | Gl | Middle Square | Ratio-F | <i>p-value</i> |
|---------------------------------|----------------|----|---------------|---------|----------------|
| X <sub>T</sub>                  | 0.23           | 1  | 0.23          | 0.64    | 0.4511         |
| X <sub>t</sub>                  | 0.4            | 1  | 0.4           | 1.09    | 0.3316         |
| X <sub>CS</sub>                 | 4.77           | 1  | 4.77          | 12.99   | 0.0087         |
| X <sub>T</sub> X <sub>T</sub>   | 0.04           | 1  | 0.04          | 0.12    | 0.7385         |
| X <sub>T</sub> X <sub>t</sub>   | 0.47           | 1  | 0.47          | 1.28    | 0.2952         |
| X <sub>T</sub> X <sub>CS</sub>  | 0.35           | 1  | 0.35          | 0.96    | 0.3599         |
| X <sub>t</sub> X <sub>t</sub>   | 1.69           | 1  | 1.69          | 4.59    | 0.0694         |
| X <sub>t</sub> X <sub>CS</sub>  | 0.95           | 1  | 0.95          | 2.59    | 0.1516         |
| X <sub>CS</sub> X <sub>CS</sub> | 1.34           | 1  | 1.34          | 3.66    | 0.0973         |
| Total error                     | 2.57           | 7  | 0.37          |         |                |
| Total (corr.)                   | 17.6882        | 16 |               |         |                |

**Table S3.** ANOVA for O content response.

| Source                          | Sum of squares | Gl | Middle Square | Ratio-F | <i>p-value</i> |
|---------------------------------|----------------|----|---------------|---------|----------------|
| X <sub>T</sub>                  | 1.89           | 1  | 1.89          | 0.20    | 0.6648         |
| X <sub>t</sub>                  | 33.34          | 1  | 33.34         | 3.60    | 0.0995         |
| X <sub>CS</sub>                 | 112.69         | 1  | 112.69        | 12.18   | 0.0101         |
| X <sub>T</sub> X <sub>T</sub>   | 32.91          | 1  | 32.91         | 3.56    | 0.1013         |
| X <sub>T</sub> X <sub>t</sub>   | 1.08           | 1  | 1.08          | 0.12    | 0.7418         |
| X <sub>T</sub> X <sub>CS</sub>  | 0.78           | 1  | 0.78          | 0.09    | 0.7790         |
| X <sub>t</sub> X <sub>t</sub>   | 34.15          | 1  | 34.15         | 3.69    | 0.0962         |
| X <sub>t</sub> X <sub>CS</sub>  | 39.38          | 1  | 39.38         | 4.26    | 0.0780         |
| X <sub>CS</sub> X <sub>CS</sub> | 6.07           | 1  | 6.07          | 0.66    | 0.4447         |
| Total error                     | 64.78          | 7  | 9.25          |         |                |
| Total (corr.)                   | 313.78         | 16 |               |         |                |

**Table S4.** Elemental composition of biocrude at the optimum conditions (320 °C, 10 min and 10 wt% of biomass concentration).

| H (wt%)   | C (wt%)    | N (wt%)   | S (wt%)   | O (wt%)    |
|-----------|------------|-----------|-----------|------------|
| 9.18±0.01 | 73.71±0.08 | 6.12±0.02 | 0.32±0.02 | 10.77±0.16 |
